# Supplementary material for: Effects of Drying Treatments on Nutritional Compositions, Volatile Flavor Compounds, and Bioactive Substances of Broad Beans
Source: MDPI journal article supplement (doi:10.3390/foods12112160), 2023-05-26
Supplement: s1 [file s1]

**Table S1.** Volatile components of broad beans by different drying methods.

| NO | Name                                   | CAS         | RT     | RIx  | RI   | Elemental<br>composition                                                       | Content (%) |            |            |
|----|----------------------------------------|-------------|--------|------|------|--------------------------------------------------------------------------------|-------------|------------|------------|
|    |                                        |             |        |      |      |                                                                                | HAD         | SD         | FD         |
| 1  | Lansoprazole                           | 103577-45-3 | 6.874  | 821  | -    | C <sub>16</sub> H <sub>14</sub> F <sub>3</sub> N <sub>3</sub> O <sub>2</sub> S | 0.79±0.13   | 0.59±0.09  | 1.40±0.19  |
| 2  | 1-Hexanol                              | 111-27-3    | 9.027  | 872  | 868  | C <sub>6</sub> H <sub>14</sub> O                                               | 20.27±1.14  | 14.71±0.92 | 4.87±0.35  |
| 3  | cis-Hept-2-enal                        | 57266-86-1  | 13.459 | 956  | 958  | C <sub>7</sub> H <sub>12</sub> O                                               | 2.44±0.73   | 1.85±0.25  | 3.57±0.24  |
| 4  | (E)-2-Hepten-1-ol                      | 33467-76-4  | 14.591 | 975  | 978  | C <sub>7</sub> H <sub>14</sub> O                                               | 1.97±0.13   | 1.16±0.09  | 0.38±0.07  |
| 5  | 1-Octen-3-ol                           | 3391-86-4   | 15.198 | 986  | 985  | C <sub>8</sub> H <sub>16</sub> O                                               | 6.47±0.42   | 3.69±0.41  | 4.67±0.41  |
| 6  | 2-n-Pentylfuran                        | 3777-69-3   | 15.564 | 992  | 993  | C <sub>9</sub> H <sub>14</sub> O                                               | 1.07±0.12   | 0.76±0.05  | 11.66±0.44 |
| 7  | 2-Ethyl-6-methylpyrazine               | 13925-03-6  | 15.937 | 998  | 1003 | C <sub>7</sub> H <sub>10</sub> N <sub>2</sub>                                  | 0.32±0.05   | 0.28±0.09  | nd         |
| 8  | Methylcyclooctane                      | 1502-38-1   | 16.531 | 1007 | 999  | C <sub>9</sub> H <sub>18</sub>                                                 | 0.43±0.07   | 0.39±0.03  | 0.23±0.01  |
| 9  | (+)-m-Mentha-1(6),8-diene              | 1461-27-4   | 17.808 | 1025 | 1027 | C <sub>10</sub> H <sub>16</sub>                                                | 1.90±0.05   | 1.43±0.03  | 21.60±1.00 |
| 10 | trans-3-Octen-2-one                    | 18402-82-9  | 18.767 | 1039 | 1033 | C <sub>8</sub> H <sub>14</sub> O                                               | 4.72±0.21   | 3.81±0.12  | 1.59±0.16  |
| 11 | Benzyl alcohol                         | 100-51-6    | 19.043 | 1043 | 1036 | C <sub>7</sub> H <sub>8</sub> O                                                | nd          | 0.46±0.10  | 0.48±0.15  |
| 12 | (E)-2-Octen-1-al                       | 2548-87-0   | 20.023 | 1057 | 1060 | C <sub>8</sub> H <sub>14</sub> O                                               | 1.49±0.26   | 0.80±0.15  | 0.67±0.05  |
| 13 | 2-Methyldecane                         | 6975-98-0   | 20.299 | 1061 | 1064 | C <sub>11</sub> H <sub>24</sub>                                                | 0.30±0.04   | 0.24±0.06  | 0.23±0.02  |
| 14 | (2Z)-2-Octen-1-ol                      | 26001-58-1  | 21.079 | 1072 | 1067 | C <sub>8</sub> H <sub>16</sub> O                                               | 3.35±0.34   | 2.62±0.28  | 1.65±0.17  |
| 15 | 1-Octanol                              | 111-87-5    | 21.293 | 1075 | 1071 | C <sub>8</sub> H <sub>18</sub> O                                               | 3.28±0.34   | 2.36±0.33  | 2.21±0.18  |
| 16 | trans-Linalool oxide<br>(furanoid)     | 34995-77-2  | 22.080 | 1086 | 1086 | C <sub>10</sub> H <sub>18</sub> O <sub>2</sub>                                 | 0.69±0.03   | 0.74±0.07  | 0.28±0.04  |
| 17 | 3,5-Octadien-2-one                     | 38284-27-4  | 22.681 | 1095 | 1091 | C <sub>8</sub> H <sub>12</sub> O                                               | 0.93±0.08   | 1.40±0.04  | 0.60±0.04  |
| 18 | O-Decylhydroxylamine                   | 29812-79-1  | 23.033 | 1100 | 1100 | C <sub>10</sub> H <sub>23</sub> NO                                             | 0.70±0.02   | 0.31±0.07  | 0.39±0.04  |
| 19 | 5-Undecyne                             | 2294-72-6   | 23.268 | 1102 | 1107 | C <sub>11</sub> H <sub>20</sub>                                                | 1.02±0.05   | 0.38±0.11  | 0.43±0.03  |
| 20 | Nonanal                                | 124-19-6    | 23.496 | 1105 | 1104 | C <sub>9</sub> H <sub>18</sub> O                                               | 1.61±0.25   | 1.63±0.11  | 1.71±0.15  |
| 21 | 10-Undecenyl<br>phenylacetate #        | -           | 24.621 | 1116 | -    | C <sub>19</sub> H <sub>28</sub> O <sub>2</sub>                                 | 2.38±0.23   | 2.26±0.37  | 1.40±0.17  |
| 22 | Pentylcyclohexane                      | 4292-92-6   | 25.642 | 1126 | 1135 | C <sub>11</sub> H <sub>22</sub>                                                | 0.63±0.06   | 0.45±0.09  | 0.42±0.03  |
| 23 | 5-Methylundecane                       | 1632-70-8   | 28.134 | 1150 | 1156 | C <sub>12</sub> H <sub>26</sub>                                                | 2.32±0.43   | 1.78±0.22  | 1.53±0.15  |
| 24 | 2,3-Dimethyldecane                     | 17312-44-6  | 29.032 | 1159 | 1157 | C <sub>12</sub> H <sub>26</sub>                                                | 2.69±0.65   | 2.67±0.12  | 1.78±0.14  |
| 25 | 3-Methylundecane                       | 1002-43-3   | 29.701 | 1165 | 1170 | C <sub>12</sub> H <sub>26</sub>                                                | 2.08±0.31   | 1.94±0.17  | 1.37±0.09  |
| 26 | (4E)-4-Dodecene                        | 7206-15-7   | 30.633 | 1174 | 1181 | C <sub>12</sub> H <sub>24</sub>                                                | 3.53±0.02   | 5.18±1.36  | 2.15±0.10  |
| 27 | Dodecane                               | 112-40-3    | 33.236 | 1200 | 1200 | C <sub>12</sub> H <sub>26</sub>                                                | 3.58±0.46   | 3.95±0.19  | 2.67±0.07  |
| 28 | 2,6-Dimethylundecane                   | 17301-23-4  | 34.927 | 1219 | 1210 | C <sub>13</sub> H <sub>28</sub>                                                | 2.07±0.54   | 2.25±0.53  | 1.33±0.10  |
| 29 | (4Z)-4-Tridecene                       | 41446-54-2  | 39.041 | 1267 | 1279 | C <sub>13</sub> H <sub>26</sub>                                                | 0.34±0.03   | 0.29±0.04  | 0.24±0.00  |
| 30 | 2,6,11-Trimethyldodecane               | 31295-56-4  | 39.690 | 1274 | 1275 | C <sub>15</sub> H <sub>32</sub>                                                | 1.01±0.43   | 0.60±0.06  | 0.50±0.08  |
| 31 | 2-Butyl-1-octanol                      | 3913-02-8   | 40.276 | 1281 | 1277 | C <sub>12</sub> H <sub>26</sub> O                                              | 0.57±0.11   | 0.63±0.11  | 0.47±0.03  |
| 32 | 2-Hexyl-1-octanol                      | 19780-79-1  | 40.684 | 1286 | -    | C <sub>14</sub> H <sub>30</sub> O                                              | 1.52±0.21   | 2.62±0.45  | 1.90±0.11  |
| 33 | (Cetyloxymethyl)oxirane                | 15965-99-8  | 41.367 | 1294 | -    | C <sub>19</sub> H <sub>38</sub> O <sub>2</sub>                                 | 0.42±0.03   | 0.25±0.01  | 0.32±0.09  |
| 34 | Tridecane                              | 629-50-5    | 41.885 | 1300 | 1300 | C <sub>13</sub> H <sub>28</sub>                                                | 1.98±0.05   | 2.38±0.09  | 1.47±0.10  |
| 35 | 1-Dodecene oxide                       | 2855-19-8   | 42.264 | 1308 | 1307 | C <sub>12</sub> H <sub>24</sub> O                                              | 0.27±0.06   | 0.24±0.04  | 0.26±0.01  |
| 36 | Pentanoic acid, 10-<br>undecenyl ester | -           | 42.824 | 1322 | -    | C <sub>16</sub> H <sub>30</sub> O <sub>2</sub>                                 | 1.58±0.22   | 1.12±0.05  | 0.77±0.06  |
| 37 | 2,3,5,8-Tetramethyldecane              | 192823-15-7 | 43.134 | 1329 | 1318 | C <sub>14</sub> H <sub>30</sub>                                                | 0.31±0.06   | 0.36±0.03  | 0.30±0.05  |
| 38 | γ-n-Amylbutyrolactone                  | 104-61-0    | 44.839 | 1369 | 1363 | C <sub>9</sub> H <sub>16</sub> O <sub>2</sub>                                  | 3.14±0.25   | 2.37±0.58  | 1.29±0.17  |
| 39 | 3-Methyltridecane                      | 6418-41-3   | 45.019 | 1373 | 1371 | C <sub>14</sub> H <sub>30</sub>                                                | 1.40±0.03   | 1.50±0.22  | 0.97±0.11  |
| 40 | 2-Butyl-2-octenal                      | 13019-16-4  | 45.191 | 1378 | 1378 | C <sub>12</sub> H <sub>22</sub> O                                              | 0.71±0.12   | 0.42±0.19  | 0.56±0.05  |
| 41 | (4Z)-4-Tetradecene                     | 41446-65-5  | 45.606 | 1387 | 1378 | C <sub>14</sub> H <sub>28</sub>                                                | 0.27±0.06   | 0.30±0.01  | 0.24±0.02  |
| 42 | (3Z)-3-Tetradecene                     | 41446-67-7  | 45.854 | 1393 | 1384 | C <sub>14</sub> H <sub>28</sub>                                                | 0.52±0.06   | 0.86±0.07  | 0.59±0.03  |

|    |                                                  |            |        |      |      |                                                               |           |           |           |
|----|--------------------------------------------------|------------|--------|------|------|---------------------------------------------------------------|-----------|-----------|-----------|
| 43 | Tetradecane                                      | 629-59-4   | 46.13  | 1400 | 1400 | C <sub>14</sub> H <sub>30</sub>                               | 4.48±0.69 | 7.43±0.20 | 4.74±0.46 |
| 44 | Nonylcyclopentane                                | 2882-98-6  | 47.656 | 1448 | 1452 | C <sub>14</sub> H <sub>28</sub>                               | 0.42±0.06 | 0.75±0.11 | 0.57±0.05 |
| 45 | trans-Geranylacetone                             | 3796-70-1  | 47.925 | 1456 | 1453 | C <sub>13</sub> H <sub>22</sub> O                             | nd        | 0.26±0.12 | 0.86±0.10 |
| 46 | 4-(2,6,6-Trimethyl-1-cyclohexenyl)-3-buten-2-one | -          | 48.912 | 1488 | 1491 | C <sub>13</sub> H <sub>20</sub> O                             | 0.75±0.07 | 1.27±0.12 | 0.63±0.14 |
| 47 | 2-Hexyl-1-decanol                                | 2425-77-6  | 49.126 | 1494 | 1504 | C <sub>16</sub> H <sub>34</sub> O                             | 0.87±0.14 | 1.71±0.13 | 0.87±0.22 |
| 48 | Ergotamine                                       | 113-15-5   | 49.747 | 1499 | -    | C <sub>33</sub> H <sub>35</sub> N <sub>5</sub> O <sub>5</sub> | 0.29±0.05 | 0.30±0.09 | 0.38±0.09 |
| 49 | 2-Hexyl-1-octanol                                | 2882-96-4  | 51.218 | 1571 | 1570 | C <sub>16</sub> H <sub>34</sub>                               | 0.77±0.13 | 1.76±0.06 | 0.96±0.12 |
| 50 | 3-Methylpentadecane                              | 544-76-3   | 51.970 | 1599 | 1600 | C <sub>16</sub> H <sub>34</sub>                               | 1.53±0.21 | 3.02±0.34 | 2.08±0.24 |
| 51 | Hexadecane                                       | 6785-23-5  | 53.316 | 1655 | 1660 | C <sub>16</sub> H <sub>32</sub>                               | 0.26±0.02 | 0.45±0.11 | 0.31±0.05 |
| 52 | Undecylcyclopentane                              | 6418-44-6  | 55.960 | 1771 | 1770 | C <sub>18</sub> H <sub>38</sub>                               | nd        | 0.33±0.02 | 0.24±0.03 |
| 53 | 2-Hexyl-1-octanol                                | 124-06-1   | 56.498 | 1795 | 1794 | C <sub>16</sub> H <sub>32</sub> O <sub>2</sub>                | 0.14±0.05 | 0.31±0.05 | 0.41±0.04 |
| 54 | 3-Methylheptadecane                              | -          | 56.581 | 1799 | 1804 | C <sub>16</sub> H <sub>30</sub> O <sub>3</sub>                | 0.17±0.03 | 0.29±0.04 | 0.28±0.03 |
| 55 | Tetradecanoic acid, ethyl ester                  | 110-27-0   | 57.161 | 1827 | 1827 | C <sub>17</sub> H <sub>34</sub> O <sub>2</sub>                | nd        | 0.40±0.04 | 0.23±0.01 |
| 56 | Carbonic acid, tridecyl vinyl ester              | 502-69-2   | 57.589 | 1847 | 1844 | C <sub>18</sub> H <sub>36</sub> O                             | 0.27±0.05 | 0.68±0.04 | 0.49±0.07 |
| 57 | Isopropyl myristate                              | 54833-48-6 | 58.659 | 1899 | 1889 | C <sub>21</sub> H <sub>44</sub>                               | 0.68±0.07 | 1.10±0.06 | 0.40±0.09 |
| 58 | Hexahydrofarnesyl acetone                        | 112-39-0   | 59.225 | 1928 | 1926 | C <sub>17</sub> H <sub>34</sub> O <sub>2</sub>                | 0.68±0.11 | 0.86±0.08 | 0.43±0.07 |
| 59 | 2,6,10,15-Tetramethylheptadecane                 | 628-97-7   | 60.557 | 1996 | 1993 | C <sub>18</sub> H <sub>36</sub> O <sub>2</sub>                | 0.66±0.17 | 1.93±0.37 | 2.48±0.34 |
| 60 | .n-Hexadecanoic acid methyl ester                | 2462-85-3  | 62.462 | 2097 | 2101 | C <sub>19</sub> H <sub>34</sub> O <sub>2</sub>                | 0.52±0.13 | 1.09±0.12 | 0.40±0.10 |
| 61 | Ethyl hexadecanoate                              | 544-35-4   | 63.663 | 2164 | 2162 | C <sub>20</sub> H <sub>36</sub> O <sub>2</sub>                | 0.44±0.10 | 2.02±0.01 | 1.34±0.30 |

\* -: nothing; nd: the substance is not detected.

**Table S2.** Compounds with P-value < 0.05 and VIP > 1.0 between broad beans by three drying methods based on the PLS-DA.

| NO | RT (min) | Proposed compound                                                         | M/Z    | Elemental composition                                         | Ion                | M/Z (Fragment ion)                  | Error (ppm) |
|----|----------|---------------------------------------------------------------------------|--------|---------------------------------------------------------------|--------------------|-------------------------------------|-------------|
| 1  | 1.44     | 5-Oxoproline                                                              | 128.03 | C <sub>5</sub> H <sub>7</sub> NO <sub>3</sub>                 | [M-H] <sup>-</sup> | 85.0318                             | 0.78        |
| 2  | 1.57     | Leucine                                                                   | 130.08 | C <sub>6</sub> H <sub>13</sub> NO <sub>2</sub>                | [M-H] <sup>-</sup> | 86.4219                             | 3.07        |
| 3  | 5.86     | Salicylic acid                                                            | 137.02 | C <sub>7</sub> H <sub>6</sub> O <sub>3</sub>                  | [M-H] <sup>-</sup> | 93.0365                             | 3.65        |
| 4  | 1.22     | Citric acid                                                               | 191.02 | C <sub>6</sub> H <sub>8</sub> O <sub>7</sub>                  | [M-H] <sup>-</sup> | 111.0102;129.0204;173.0088          | 1.57        |
| 5  | 6.06     | gamma-Glutamyl leucine                                                    | 259.13 | C <sub>11</sub> H <sub>20</sub> N <sub>2</sub> O <sub>5</sub> | [M-H] <sup>-</sup> | 84.0448;198.1126                    | 5.01        |
| 6  | 3.87     | Epicatechin                                                               | 289.07 | C <sub>15</sub> H <sub>14</sub> O <sub>6</sub>                | [M-H] <sup>-</sup> | 109.0277;125.0271;203.0692;245.0817 | 1.73        |
| 7  | 13.34    | Kaempferol 3-O-Beta-D-Glucopyranosyl-7-O-Alpha-L-Rhamnopyranoside 3"-O-L- | 593.15 | C <sub>27</sub> H <sub>30</sub> O <sub>15</sub>               | [M-H] <sup>-</sup> | 433.0986                            | 1.52        |
| 8  | 14.35    | Rhamnopyranosylast ragalin                                                | 593.16 | C <sub>27</sub> H <sub>30</sub> O <sub>15</sub>               | [M-H] <sup>-</sup> | 284.0356;285.0399                   | 2.70        |
| 9  | 17.21    | Licoricesaponin J2                                                        | 823.41 | C <sub>42</sub> H <sub>64</sub> O <sub>16</sub>               | [M-H] <sup>-</sup> | 175.0232;193.0382                   | 1.45        |
| 10 | 8.37     | Procyanidin C1                                                            | 865.19 | C <sub>45</sub> H <sub>38</sub> O <sub>18</sub>               | [M-H] <sup>-</sup> | 125.0288;289.0768;407.0763          | -1.73       |

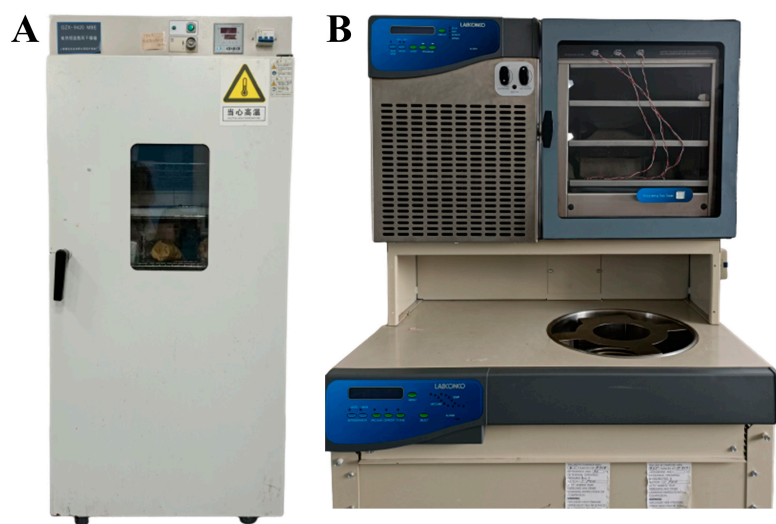

**Figure S1.** The actual photo drying equipment. (A) The convective oven (model GZX-9420MBE, Shanghai Boxun Experimental Co. LTD, China). (B) The freeze-dryer (model RS-232, Labconco Corporation, America).
